# Supplementary material for: Intrabody against prolyl hydroxylase 2 promotes angiogenesis by stabilizing hypoxia-inducible factor-1α
Source: PubMed Central journal article supplement (PMC6694103; doi:10.1038/s41598-019-47891-1), 2019-08-14
Supplement: 41598_2019_47891_MOESM1_ESM.pdf [file 41598_2019_47891_MOESM1_ESM.pdf]

## **Supplementary information**

### **Intrabody against prolyl hydroxylase 2 promotes angiogenesis by stabilizing hypoxia-inducible factor-1 $\alpha$**

Liangzhong Zhao<sup>1,2</sup>, Ziyu Liu<sup>1</sup>, Fang Yang<sup>1</sup>, Ying Zhang<sup>1,3</sup>, Ying Xue<sup>1</sup>, Haipeng Miao<sup>1</sup>, Xiangzhi Liao<sup>1</sup>, Hongli Huang<sup>1</sup>, Guiying Li<sup>1\*</sup>

1 Key Laboratory for Molecular Enzymology and Engineering of the Ministry of Education, School of Life Sciences, Jilin University, Changchun 130012, China;

2 Department of Immunoassay Technology, Jilin Medical University, Jilin 132013, China;

3 Department of Pediatrics, The First Hospital of Jilin University, Changchun, Jilin 130021, P.R. China;

\* **Corresponding author:** Guiying Li, Key Laboratory for Molecular Enzymology and Engineering of the Ministry of Education, School of Life Sciences, Jilin University, Changchun 130012, China. Tel.: +86-431-85155222 E-mail: ligy@jlu.edu.cn.

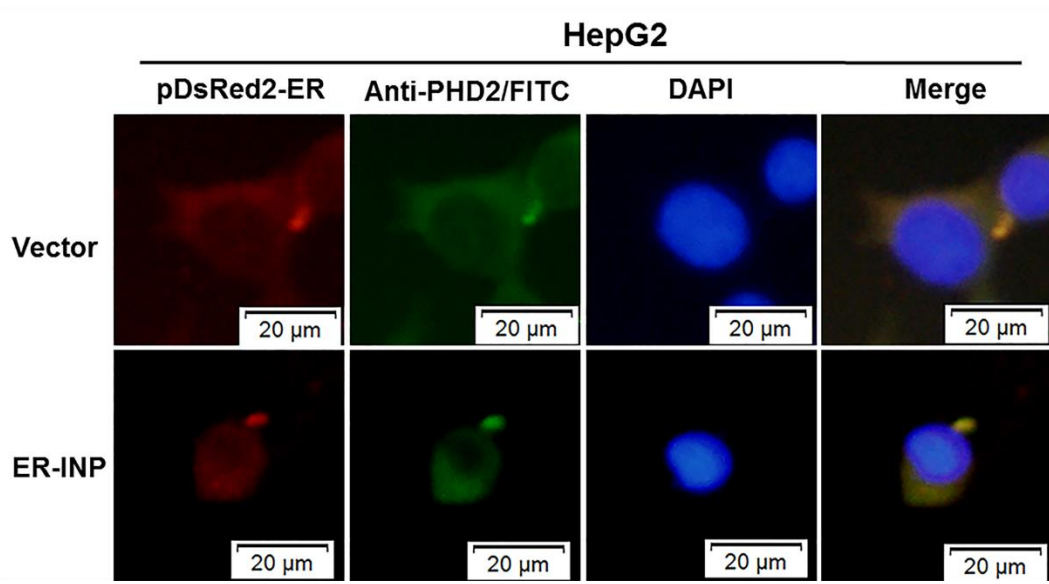

Supplement Figure 1. Intracellular localization of PHD2 by Immunofluorescence assay in HepG2 cells. pDsRed2-ER and PHD2 are co-localized in the endoplasmic reticulum.

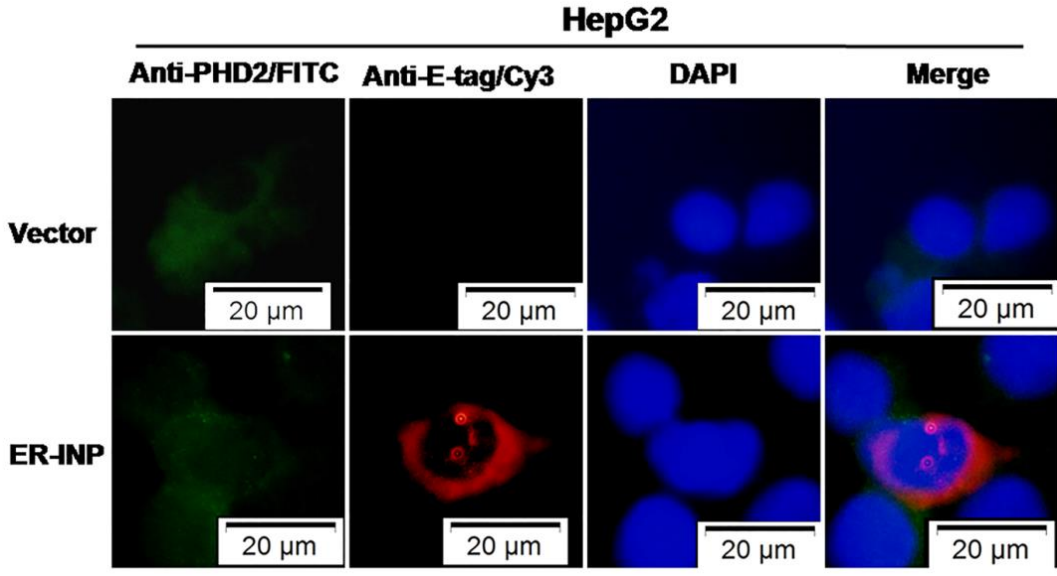

Supplement Figure 2. Intracellular localization of PHD2 and ER-INP by Immunofluorescence assay. PHD2 and ER-INP are co-localized in the endoplasmic reticulum.

The data used to support the findings of this article is as follows.

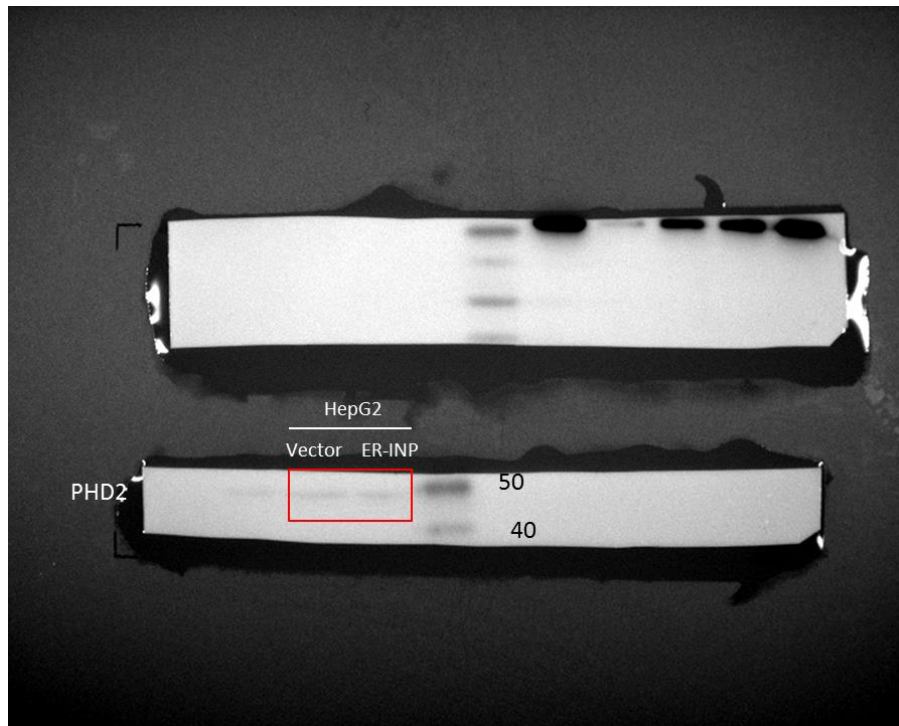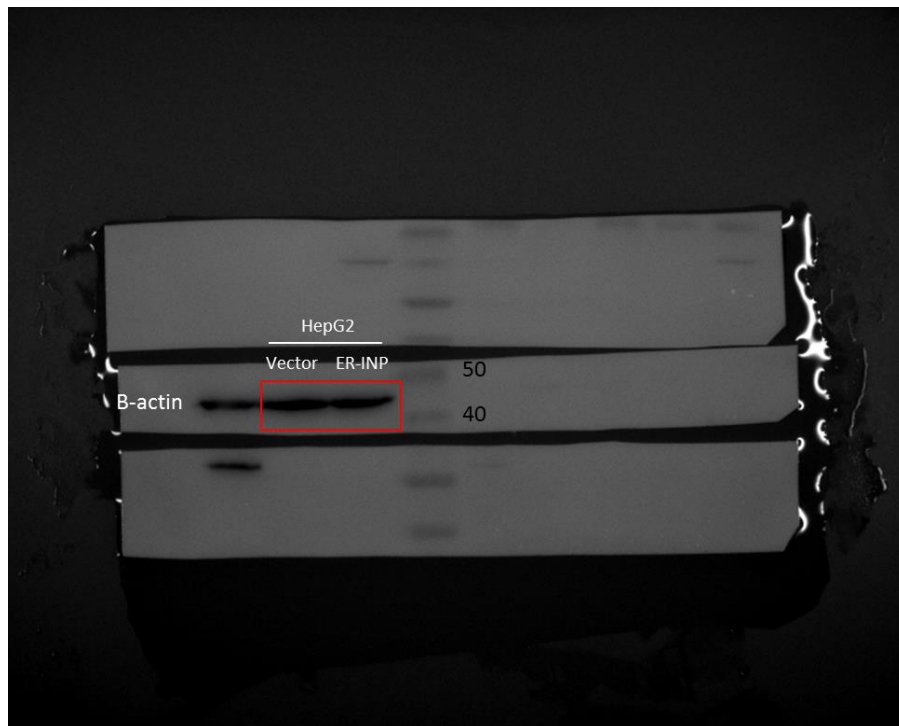

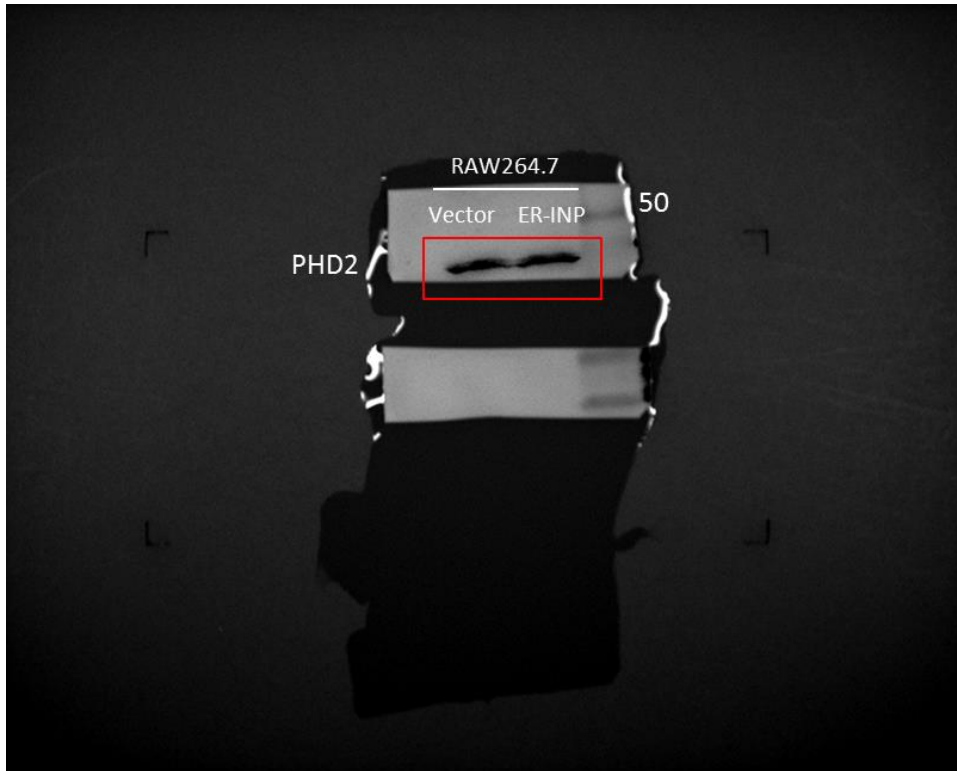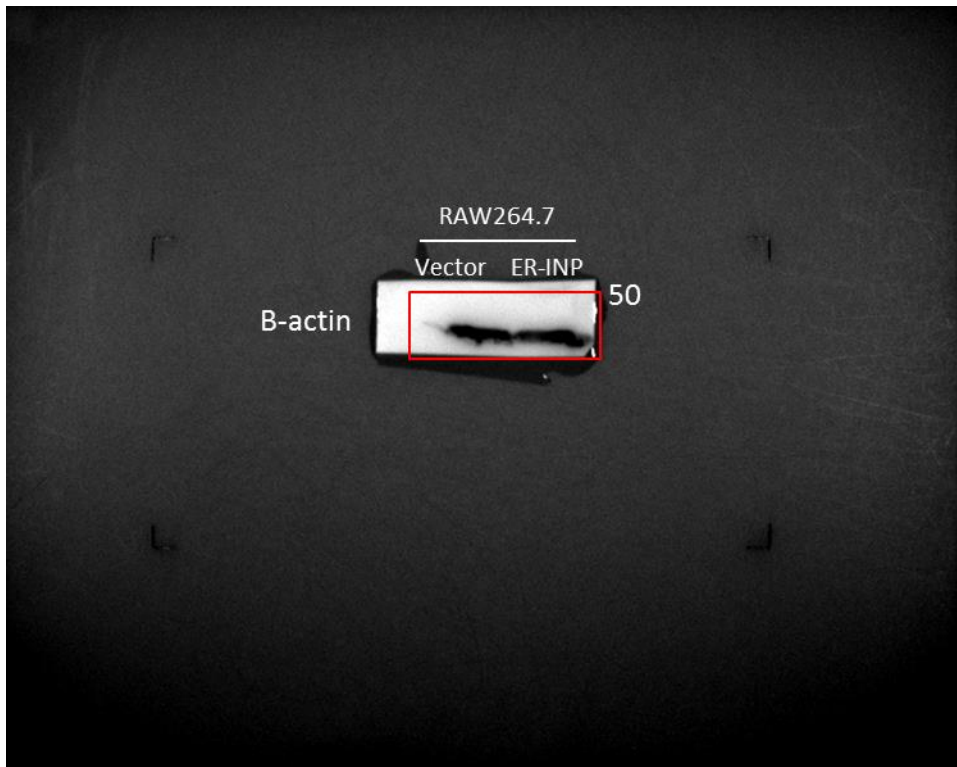

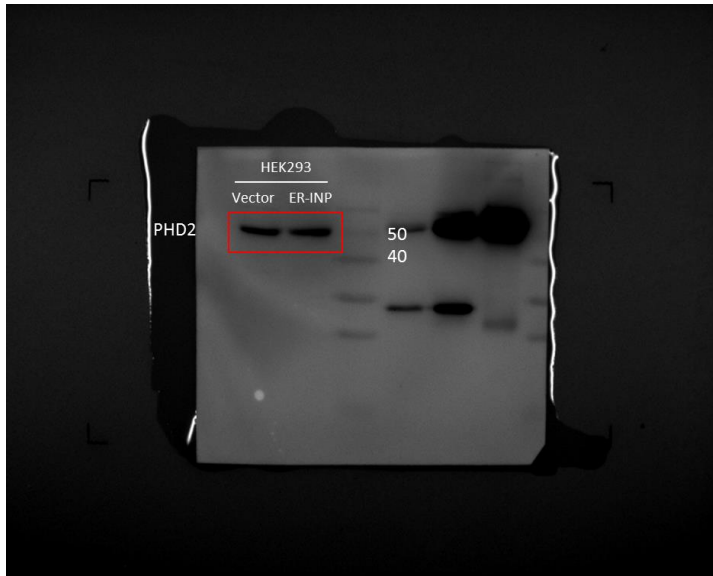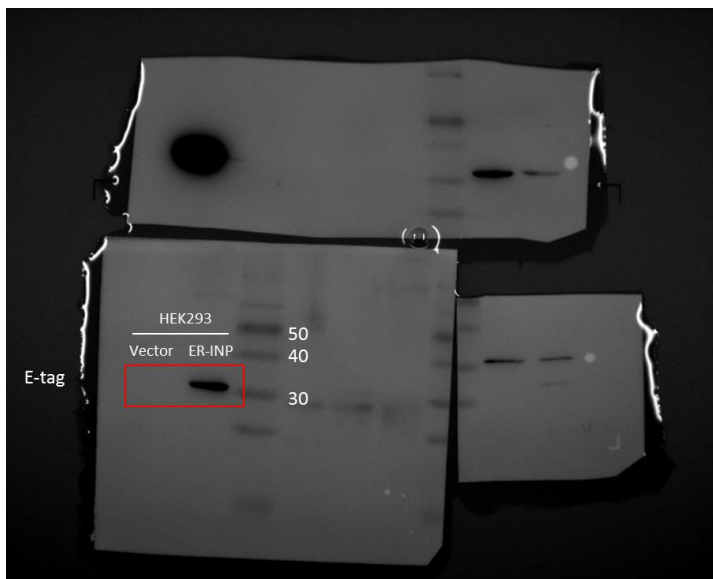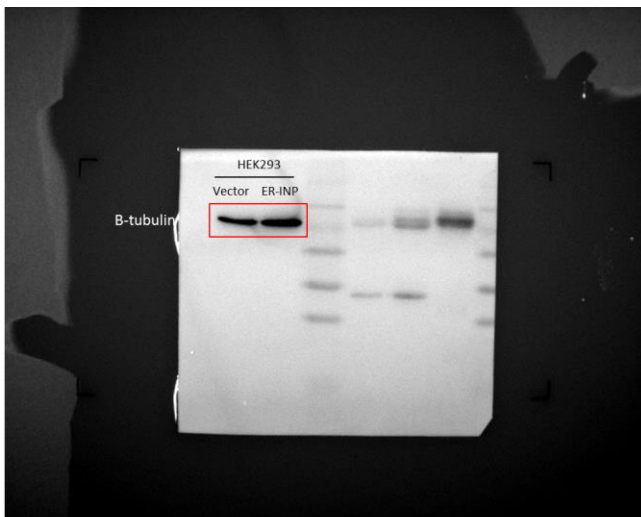

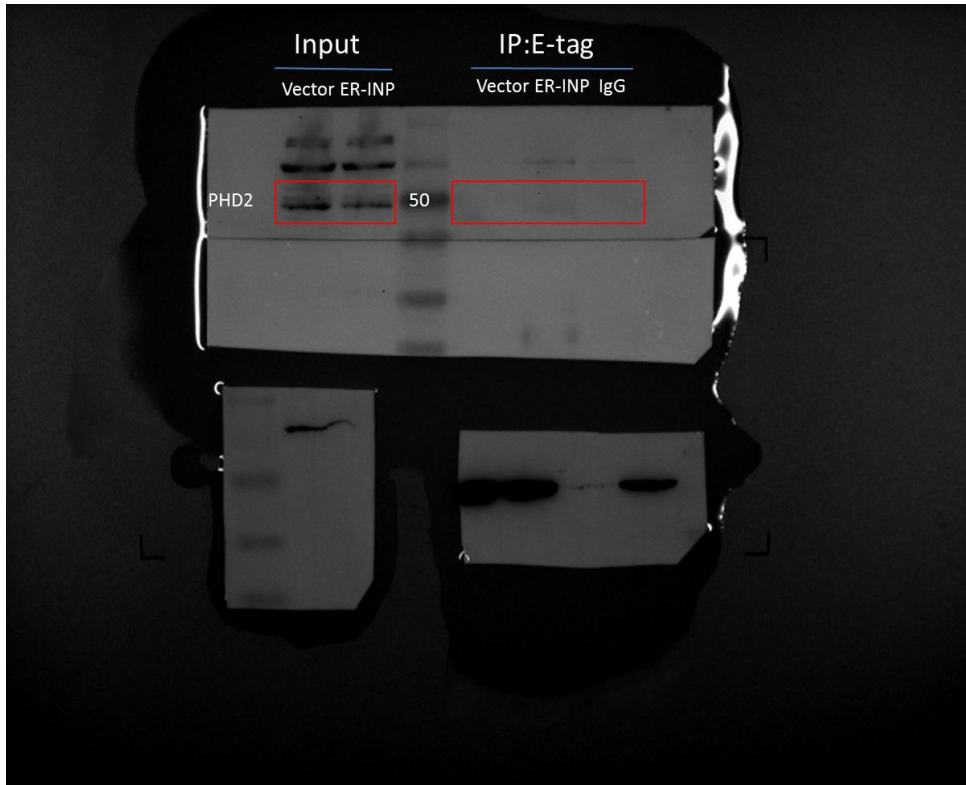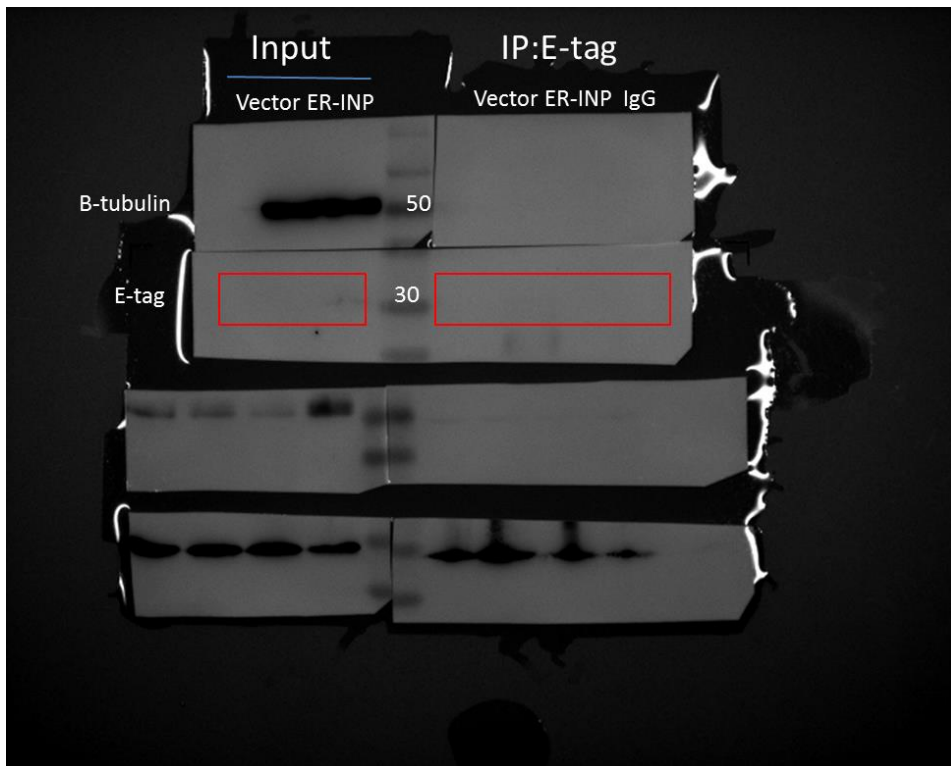



HEK293(MG132)

Vector ER-INP

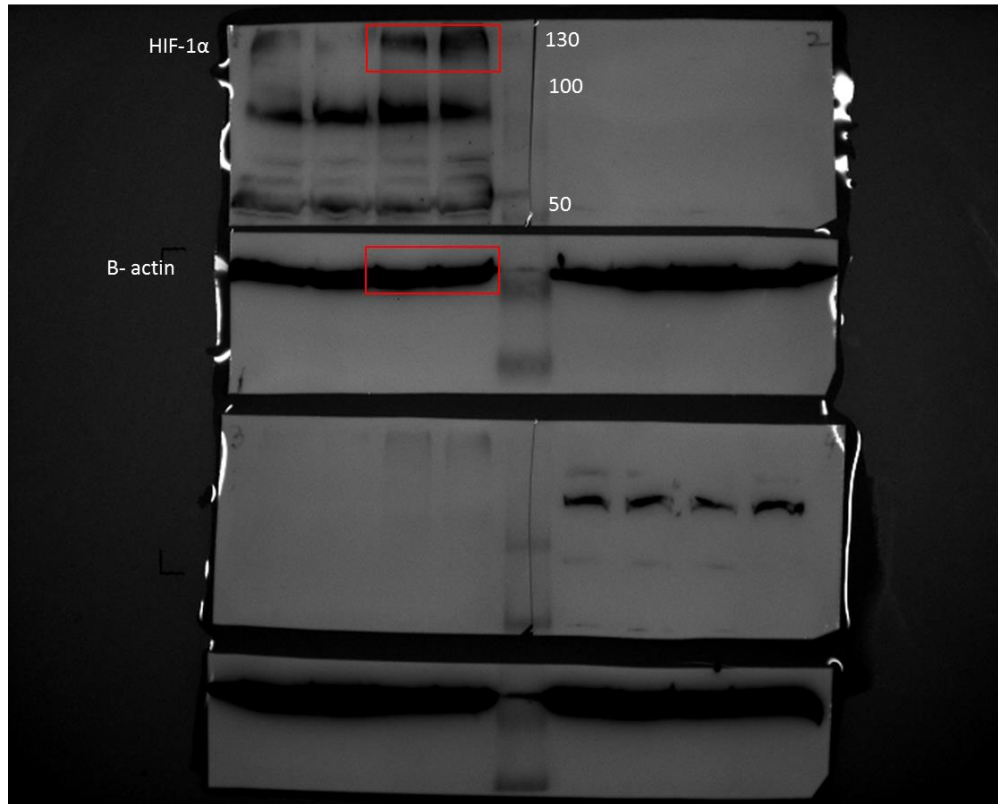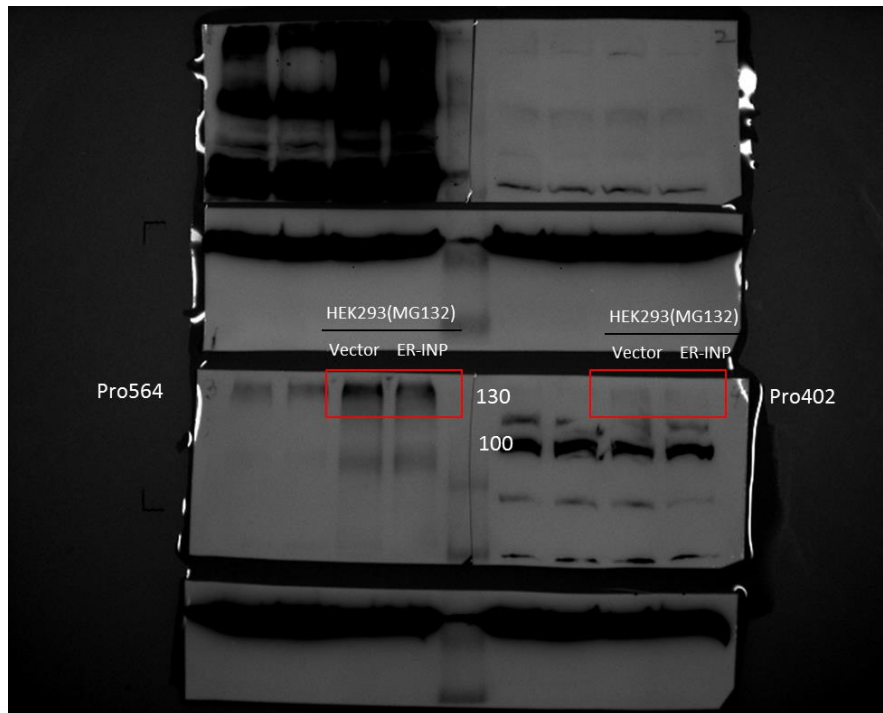

RAW264.7(MG132)

Vector ER-INP

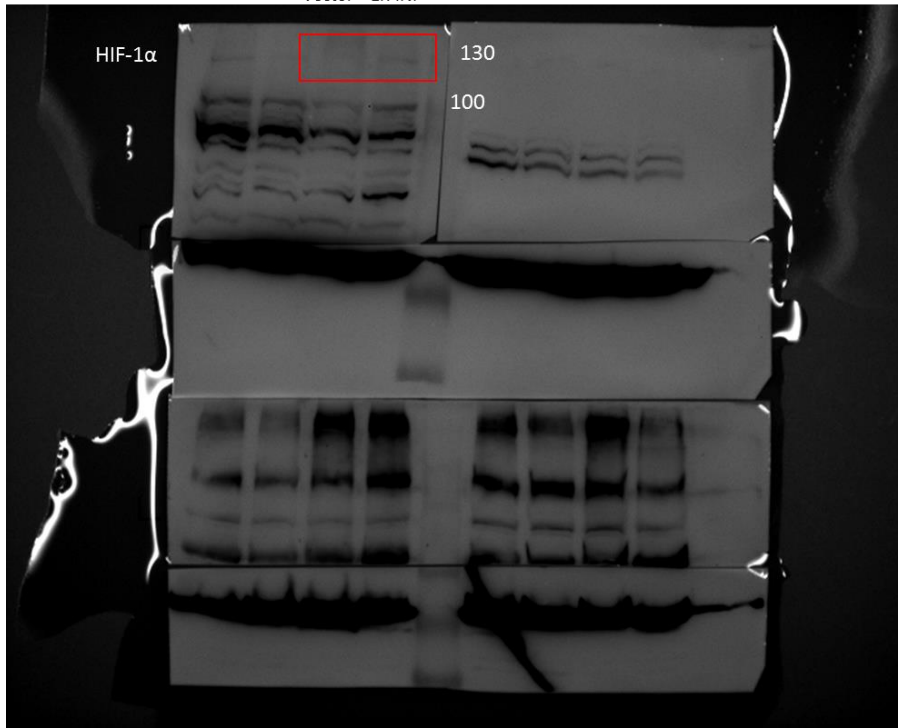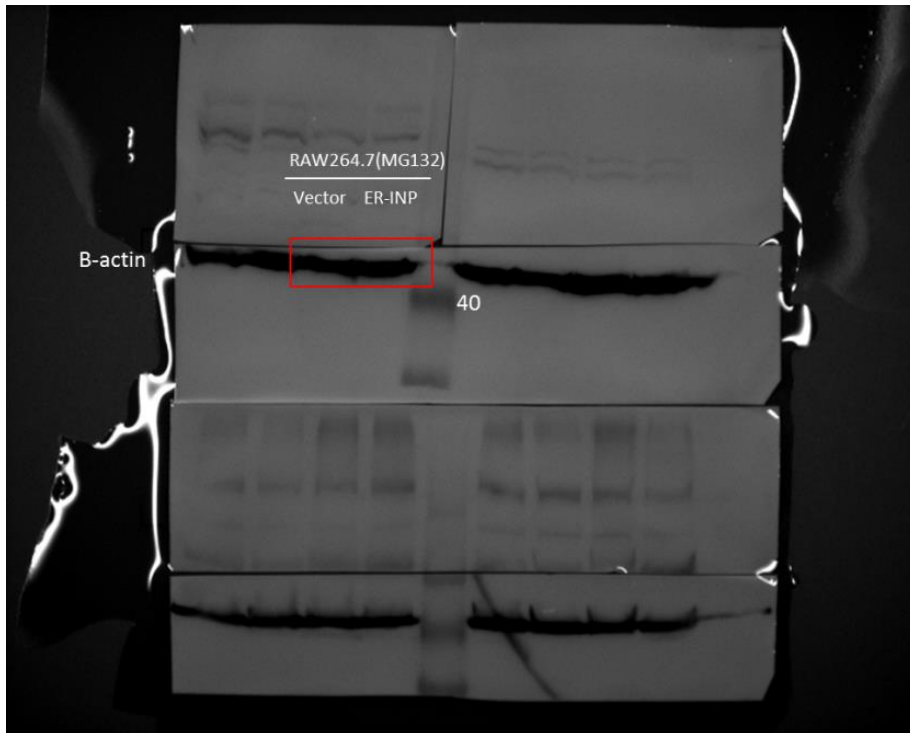



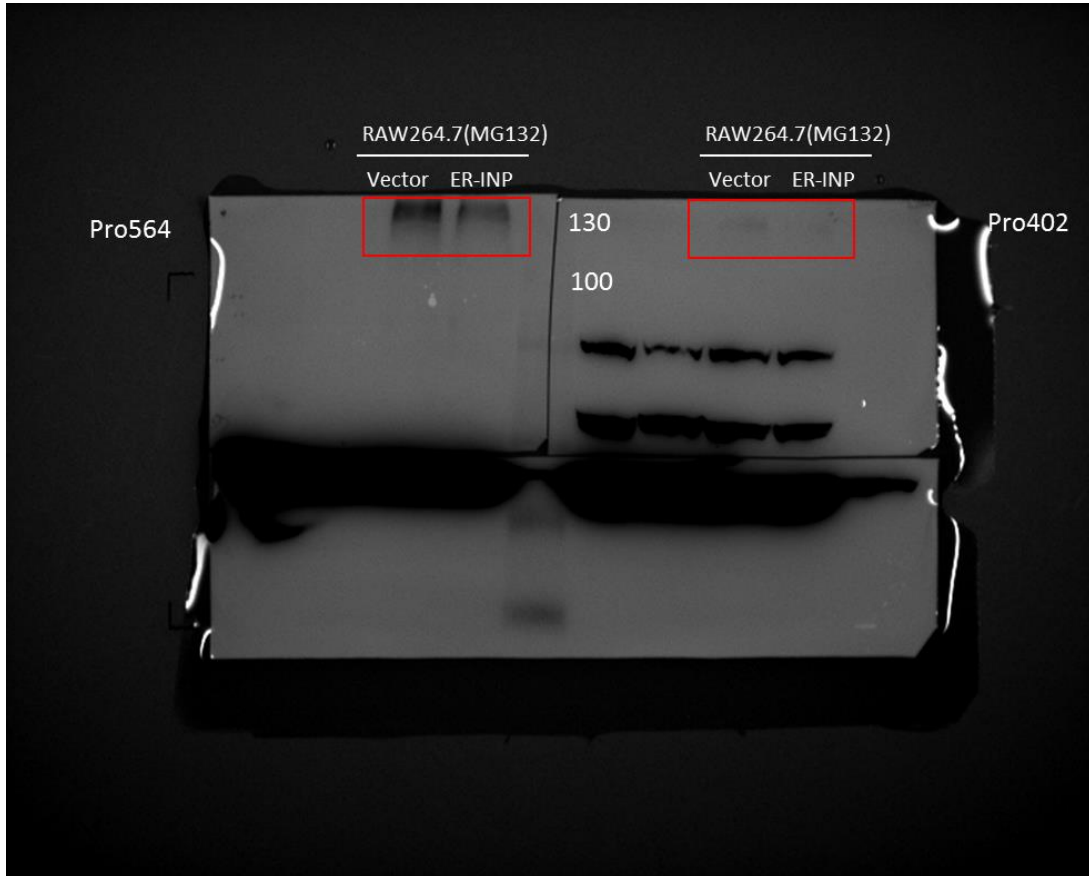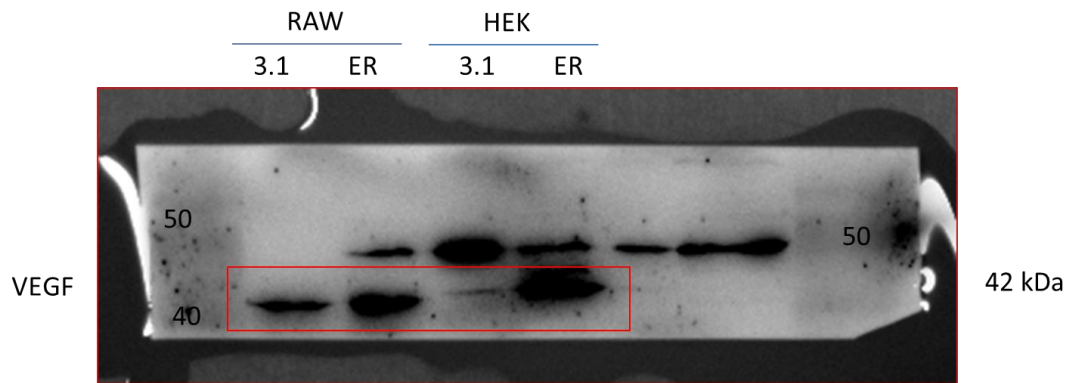

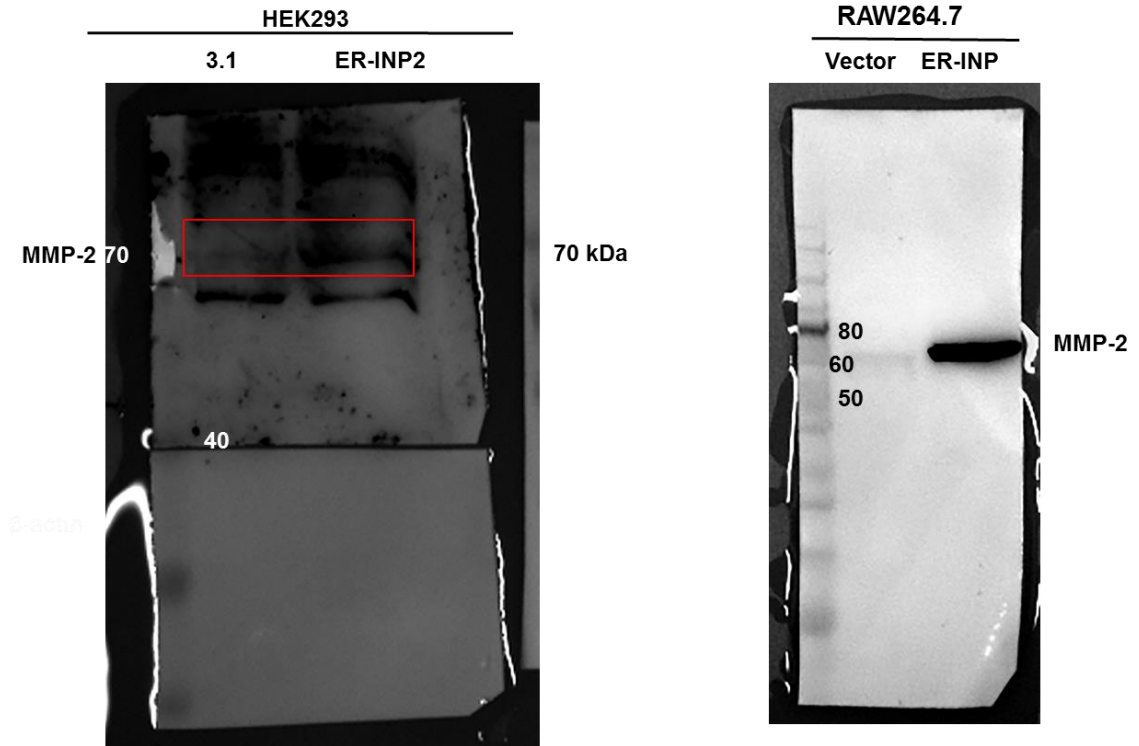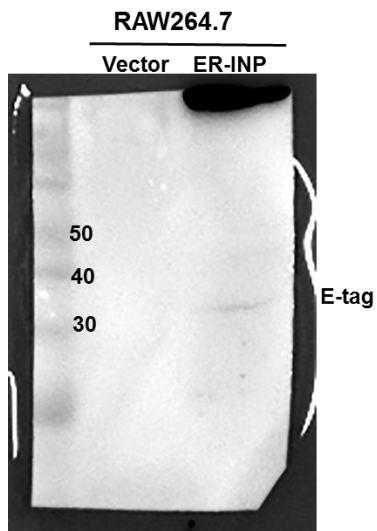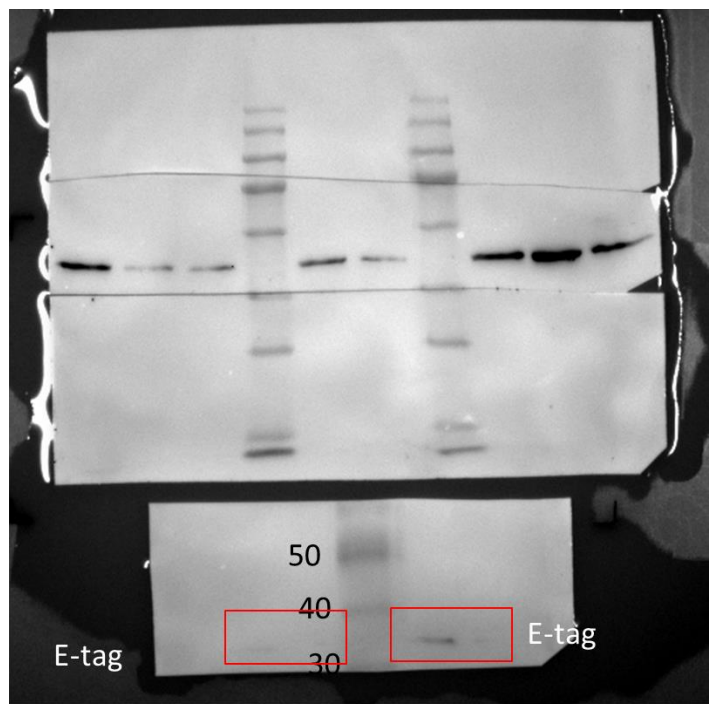

ER 3.1

ER 3.1

HepG2

HepG2
